# Supplementary material
Source: publisher site journal article supplement (https://www.dovepress.com/article/414452)
Supplement: Supplementary file 1 [file get_supplementary_file.php]

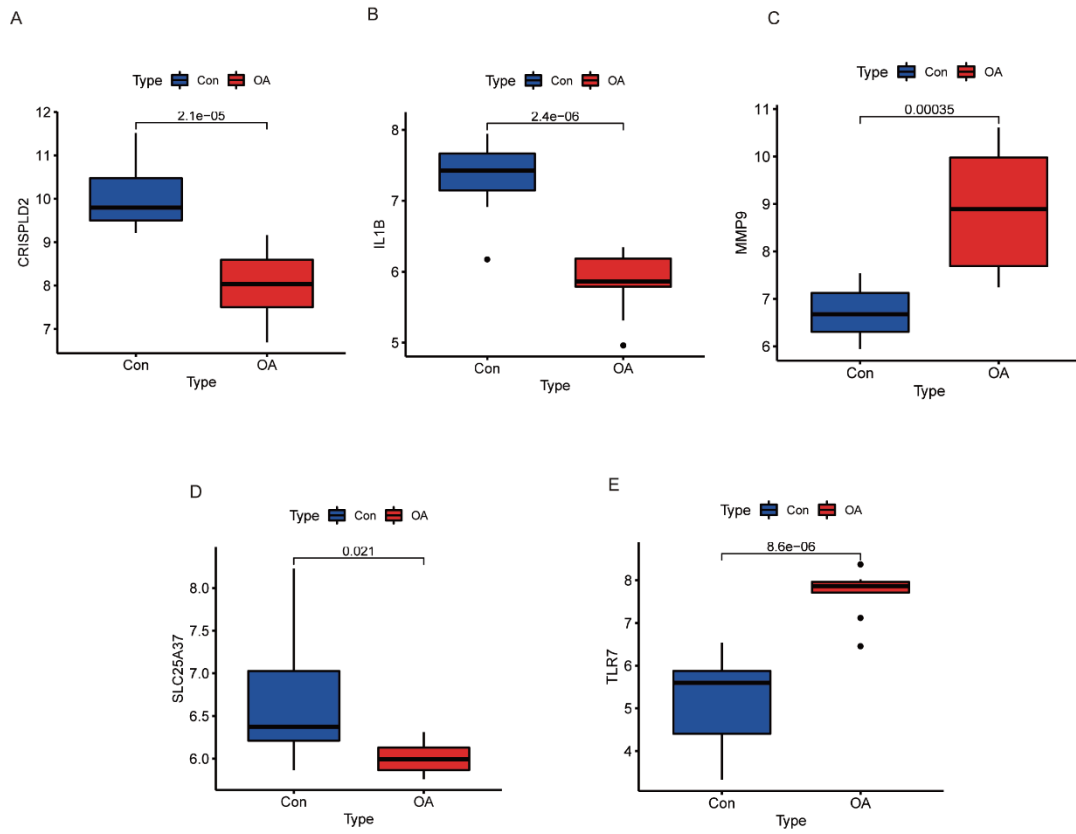

## GSE55235

**Figure S1 | Validation of Differently Expressed Genes** The dataset GSE55235 was used to validate the expression of DE-NRGs (A-E).

**Supplementary Table S1 NETs related gene****Gene ID**

| <b>HGNC symbol</b> | <b>Entrez Gene</b> | <b>Ensembl</b>  |
|--------------------|--------------------|-----------------|
| ALPL               | 249                | ENSG00000162551 |
| BST1               | 683                | ENSG00000109743 |
| CD93               | 22918              | ENSG00000125810 |
| CEACAM3            | 1084               | ENSG00000170956 |
| CREB5              | 9586               | ENSG00000146592 |
| CRISPLD2           | 83716              | ENSG00000103196 |
| CSF3R              | 1441               | ENSG00000119535 |
| CYP4F3             | 4051               | ENSG00000186529 |
| DYSF               | 8291               | ENSG00000135636 |
| FCAR               | 2204               | ENSG00000186431 |
| FCGR3B             | 2215               | ENSG00000162747 |
| CPPED1             | 55313              | ENSG00000103381 |
| FPR1               | 2357               | ENSG00000171051 |
| FPR2               | 2358               | ENSG00000171049 |
| G0S2               | 50486              | ENSG00000123689 |
| HIST1H2BC          | 8347               | ENSG00000180596 |
| HPSE               | 10855              | ENSG00000173083 |
| CXCR1              | 3577               | ENSG00000163464 |
| CXCR2              | 3579               | ENSG00000180871 |
| KCNJ15             | 3772               | ENSG00000157551 |
| LILRB2             | 10288              | ENSG00000131042 |
| MGAM               | 8972               | ENSG00000257335 |
| MME                | 4311               | ENSG00000196549 |
| PDE4B              | 5142               | ENSG00000184588 |
| S100A12            | 6283               | ENSG00000163221 |
| SIGLEC5            | 8778               | ENSG00000105501 |
| SLC22A4            | 6583               | ENSG00000197208 |
| SLC25A37           | 51312              | ENSG00000147454 |
| TECPR2             | 9895               | ENSG00000196663 |
| TNFRSF10C          | 8794               | ENSG00000173535 |
| VNN3               | 55350              | ENSG00000093134 |
| AKT1               | 207                | ENSG00000142208 |
| AKT2               | 208                | ENSG00000105221 |
| ATG7               | 10533              | ENSG00000197548 |
| CLEC6A             | 93978              | ENSG00000205846 |
| CSF3               | 1440               | ENSG00000108342 |
| CTSG               | 1511               | ENSG00000100448 |
| CYBB               | 1536               | ENSG00000165168 |
| DNASE1             | 1773               | ENSG00000213938 |
| ELANE              | 1991               | ENSG00000197561 |
| ENTPD4             | 14573              | ENSG00000197217 |
| F3                 | 2152               | ENSG00000117525 |
| HMGB1              | 3146               | ENSG00000189403 |
| IL17A              | 3605               | ENSG00000112115 |
| IL1B               | 3553               | ENSG00000125538 |
| IL6                | 3569               | ENSG00000136244 |
| IL8                | 3576               | ENSG00000169429 |
| IRAK4              | 51135              | ENSG00000198001 |
| ITGAM              | 3684               | ENSG00000169896 |
| ITGB2              | 3689               | ENSG00000160255 |
| KCNN3              | 3782               | ENSG00000143603 |
| MAPK1              | 5594               | ENSG00000100030 |
| MAPK3              | 5595               | ENSG00000102882 |
| MMP9               | 4218               | ENSG00000100985 |
| MPO                | 4353               | ENSG00000005381 |

|          |          |                 |
|----------|----------|-----------------|
| MTOR     | 2475     | ENSG00000198793 |
| PADI4    | 23569    | ENSG00000159339 |
| PTAFR    | 5724     | ENSG00000169403 |
| PIK3CA   | 5290     | ENSG00000121879 |
| RIPK1    | 8737     | ENSG00000137275 |
| RIPK3    | 11035    | ENSG00000129465 |
| SELP     | 6403     | ENSG00000174175 |
| SELPLG   | 6404     | ENSG00000110876 |
| SIGLEC14 | 10049587 | ENSG00000254415 |
| TLR2     | 7097     | ENSG00000137462 |
| TLR4     | 7099     | ENSG00000136869 |
| TLR7     | 51284    | ENSG00000196664 |
| TLR8     | 51311    | ENSG00000101916 |
| TNF      | 7124     | ENSG00000232810 |

## Supplementary Table S2 Primer sequences

| Primer name           | 5' to 3'                 |
|-----------------------|--------------------------|
| CRISPLD2-Mouse-F      | GGCCATCCCCATGTCAGAC      |
| CRISPLD2-Mouse-R      | CATCCCAAGTCATGTGTTCCA    |
| CRISPLD2-Human-F      | GCTGTCGCCGCTGCTACCGC     |
| CRISPLD2-Human-R      | GACGCCCCTTCTCCCCTGGT     |
| IL-1 $\beta$ -Mouse-F | GCAACTGTTCTGAACTCAACT    |
| IL-1 $\beta$ -Mouse-R | ATCTTTTGGGGTCCGTCAACT    |
| IL-1 $\beta$ -Human-F | AGCTACGAATCTCCGACCAC     |
| IL-1 $\beta$ -Human-R | CGTTATCCCATGTGTCGAAGAA   |
| SLC25A37-Mouse-F      | CCTACTCCACGATGCAGTAATG   |
| SLC25A37-Mouse-R      | AGTGAATTGACTGGAAGGGGATA  |
| SLC25A37-Human-F      | GATGGGGACAGCCGAGATG      |
| SLC25A37-Human-R      | ACCGGGTACATGACCGAGT      |
| MMP9-Mouse-F          | CTGGACAGCCAGACACTAAAG    |
| MMP9-Mouse-R          | CTCGCGGCAAGTCTTCAGAG     |
| MMP9-Human-F          | GGGACGCAGACATCGTCATC     |
| MMP9-Human-R          | TCGTCATCGTCGAAATGGGC     |
| TLR7-mouse-F          | TCCTTGGGGCTAGATGGTTTC    |
| TLR7-mouse-R          | TCCACGATCACATGGTTCTTTG   |
| TLR7-Human-F          | CATGCTCTGCTCTCTTCAACCAG  |
| TLR7-Human-R          | AGTGACATCACAGGGCAGAGTT   |
| GAPDH-Mouse-F         | AGGTCGGTGTGAACGGATTTG    |
| GAPDH-Mouse-R         | TGTAGACCATGTAGTTGAGGTCA  |
| GAPDH-Human-F         | GGAGCGAGATCCCTCCAAAAT    |
| GAPDH-Human-R         | GGCTGTTGTCATACTTCTCATGG  |
| IL-6-Mouse-F          | TAGTCCTTCCTACCCCAATTTCC  |
| IL-6-Mouse-R          | TTGGTCCTTAGCCACTCCTTC    |
| IL-6-Human-F          | ACTCACCTCTTCAGAACGAATTG  |
| IL-6-Human-R          | CCATCTTTGGAAGGTTTCAGGTTG |

Supplementary Table S3 Differentially expressed gene

| id        | logFC    | AveExpr  | t        | P.Value  | adj.P.Val | B        |
|-----------|----------|----------|----------|----------|-----------|----------|
| FOSL2     | -1.0958  | 8.701322 | -10.1126 | 2.38E-16 | 2.90E-12  | 26.55866 |
| CDKN1A    | -1.11296 | 10.60289 | -9.80277 | 1.02E-15 | 6.22E-12  | 25.1685  |
| MTHFD2    | -1.02161 | 8.350415 | -9.19504 | 1.79E-14 | 7.27E-11  | 22.43089 |
| FNBP4     | -0.79333 | 9.043906 | -8.913   | 6.76E-14 | 2.06E-10  | 21.15793 |
| HNMT      | 0.714952 | 8.856746 | 8.727802 | 1.62E-13 | 2.95E-10  | 20.32209 |
| RBM6      | -0.58907 | 9.056273 | -8.71836 | 1.69E-13 | 2.95E-10  | 20.27948 |
| PRRC2C    | -0.69165 | 9.314093 | -8.44906 | 6.02E-13 | 9.17E-10  | 19.06513 |
| WSB1      | -0.58792 | 9.814044 | -8.36143 | 9.08E-13 | 1.23E-09  | 18.67044 |
| SNRNP70   | -0.62148 | 10.57606 | -8.1948  | 1.99E-12 | 2.42E-09  | 17.92078 |
| CX3CR1    | 1.510088 | 8.721065 | 8.119002 | 2.83E-12 | 3.14E-09  | 17.58025 |
| TMEM259   | -0.95618 | 8.395433 | -8.08002 | 3.40E-12 | 3.46E-09  | 17.40522 |
| TLR7      | 1.127725 | 8.950663 | 7.985478 | 5.29E-12 | 4.90E-09  | 16.98118 |
| CSN1S1    | 2.476803 | 10.13495 | 7.97255  | 5.62E-12 | 4.90E-09  | 16.92324 |
| TAF1C     | -0.86623 | 9.125913 | -7.90321 | 7.78E-12 | 5.83E-09  | 16.61265 |
| PDE1A     | 0.747995 | 9.997615 | 7.774448 | 1.42E-11 | 9.10E-09  | 16.03693 |
| EPYC      | 1.233325 | 6.53363  | 7.71402  | 1.88E-11 | 1.09E-08  | 15.76721 |
| BCL6      | -0.73423 | 9.689067 | -7.70155 | 1.99E-11 | 1.10E-08  | 15.71159 |
| BLNK      | 0.705335 | 8.065189 | 7.656628 | 2.45E-11 | 1.30E-08  | 15.51136 |
| VEGFA     | -1.61844 | 9.213641 | -7.61937 | 2.92E-11 | 1.48E-08  | 15.34542 |
| MYC       | -0.94815 | 9.365968 | -7.58267 | 3.46E-11 | 1.69E-08  | 15.18214 |
| CASP1     | 0.612612 | 9.321821 | 7.549928 | 4.03E-11 | 1.89E-08  | 15.03654 |
| BAG3      | -0.79526 | 9.382072 | -7.51964 | 4.63E-11 | 2.06E-08  | 14.90198 |
| SRRM2     | -0.70574 | 11.55116 | -7.51496 | 4.74E-11 | 2.06E-08  | 14.88117 |
| MAFF      | -1.25334 | 9.313194 | -7.49588 | 5.17E-11 | 2.18E-08  | 14.79646 |
| LINC00965 | 1.075337 | 9.392852 | 7.482585 | 5.50E-11 | 2.24E-08  | 14.73747 |
| RTN1      | 0.692425 | 8.386781 | 7.409079 | 7.73E-11 | 2.95E-08  | 14.41161 |
| UCP2      | 0.730722 | 11.13035 | 7.372571 | 9.15E-11 | 3.37E-08  | 14.25001 |
| KDM6B     | -0.96313 | 8.431216 | -7.36673 | 9.40E-11 | 3.37E-08  | 14.22418 |
| TMEM176   | 0.776979 | 11.12847 | 7.323953 | 1.14E-10 | 3.88E-08  | 14.03505 |
| TMEM176B  | 0.758607 | 10.76766 | 7.299281 | 1.28E-10 | 4.23E-08  | 13.92608 |
| THBS4     | 0.762235 | 12.09925 | 7.237644 | 1.70E-10 | 5.47E-08  | 13.65418 |
| MFAP4     | 0.756344 | 10.08218 | 7.102697 | 3.16E-10 | 9.42E-08  | 13.06073 |
| C1orf54   | 0.764369 | 10.98752 | 6.922255 | 7.21E-10 | 1.91E-07  | 12.27147 |
| NKTR      | -0.63437 | 9.450365 | -6.88063 | 8.72E-10 | 2.22E-07  | 12.09017 |
| CFI       | 0.871512 | 10.22852 | 6.801716 | 1.25E-09 | 3.10E-07  | 11.74722 |
| CPVL      | 0.675988 | 8.818111 | 6.77954  | 1.38E-09 | 3.36E-07  | 11.65106 |
| RHOBTB3   | -0.80982 | 8.991422 | -6.7195  | 1.81E-09 | 4.24E-07  | 11.39115 |
| EFEMP1    | 0.691533 | 12.08888 | 6.679478 | 2.17E-09 | 4.89E-07  | 11.21825 |
| INHBB     | -0.84699 | 8.036241 | -6.63746 | 2.62E-09 | 5.73E-07  | 11.0371  |
| MEG3      | -0.73303 | 10.10464 | -6.63652 | 2.63E-09 | 5.73E-07  | 11.03306 |
| SOGA1     | -0.64087 | 8.655629 | -6.61052 | 2.96E-09 | 6.33E-07  | 10.9211  |
| QDPR      | 0.637637 | 9.265935 | 6.551656 | 3.85E-09 | 7.81E-07  | 10.66822 |
| BST2      | 0.651473 | 9.748658 | 6.548551 | 3.90E-09 | 7.81E-07  | 10.6549  |
| IFRD1     | -0.6197  | 8.437401 | -6.53847 | 4.08E-09 | 7.91E-07  | 10.61168 |
| ARNTL     | -0.73948 | 8.384749 | -6.47759 | 5.36E-09 | 1.02E-06  | 10.35104 |
| COL14A1   | 0.652716 | 9.375786 | 6.46082  | 5.78E-09 | 1.07E-06  | 10.27939 |
| PIM1      | -1.10133 | 8.501643 | -6.4568  | 5.88E-09 | 1.07E-06  | 10.26224 |
| PTN       | 0.915822 | 10.44843 | 6.426257 | 6.74E-09 | 1.21E-06  | 10.13191 |
| PFKFB3    | -0.89702 | 10.32822 | -6.38406 | 8.14E-09 | 1.44E-06  | 9.952228 |
| PPP1R15A  | -0.80268 | 9.113151 | -6.37899 | 8.32E-09 | 1.45E-06  | 9.930652 |
| SEC31B    | -0.75114 | 7.813639 | -6.35952 | 9.08E-09 | 1.52E-06  | 9.847882 |
| S100A8    | 1.354877 | 11.2211  | 6.313316 | 1.11E-08 | 1.83E-06  | 9.651863 |
| FCER1A    | 0.985658 | 8.791551 | 6.311282 | 1.12E-08 | 1.83E-06  | 9.643247 |
| IL1R1     | -0.6213  | 10.17994 | -6.29024 | 1.23E-08 | 1.98E-06  | 9.554131 |
| SLC17A9   | -0.74565 | 9.695911 | -6.27809 | 1.30E-08 | 2.06E-06  | 9.502726 |
| APEH      | 0.701511 | 8.752441 | 6.265048 | 1.38E-08 | 2.16E-06  | 9.447614 |

|          |          |          |          |          |          |          |
|----------|----------|----------|----------|----------|----------|----------|
| COL6A3   | -0.68408 | 11.43647 | -6.25783 | 1.42E-08 | 2.19E-06 | 9.417119 |
| NCF1     | 0.898212 | 9.881338 | 6.241216 | 1.53E-08 | 2.31E-06 | 9.346973 |
| PHACTR1  | -0.7411  | 7.202359 | -6.22199 | 1.67E-08 | 2.42E-06 | 9.265892 |
| MAP2K7   | -0.68138 | 7.140184 | -6.21732 | 1.70E-08 | 2.42E-06 | 9.246214 |
| NFIL3    | -1.19958 | 10.3942  | -6.18824 | 1.94E-08 | 2.68E-06 | 9.123775 |
| CSF1R    | 0.859659 | 11.28413 | 6.146221 | 2.33E-08 | 3.16E-06 | 8.947208 |
| NELL1    | 1.09975  | 8.266776 | 6.11192  | 2.71E-08 | 3.44E-06 | 8.803424 |
| PTGS2    | -1.26258 | 7.561532 | -6.10607 | 2.78E-08 | 3.47E-06 | 8.77893  |
| SLC19A2  | -1.00559 | 7.746548 | -6.10526 | 2.79E-08 | 3.47E-06 | 8.775526 |
| CSF2RA   | 0.681626 | 8.538773 | 6.09503  | 2.91E-08 | 3.59E-06 | 8.73274  |
| RAD54L   | -0.60123 | 6.098409 | -6.07677 | 3.16E-08 | 3.85E-06 | 8.65639  |
| MCM3AP-  | -0.74558 | 7.4547   | -6.05548 | 3.46E-08 | 4.14E-06 | 8.567496 |
| ARL4C    | -0.85767 | 9.459374 | -6.04823 | 3.58E-08 | 4.19E-06 | 8.537246 |
| HPGDS    | 0.618427 | 9.942964 | 6.037011 | 3.76E-08 | 4.36E-06 | 8.490493 |
| ZC3H7B   | -0.84419 | 7.156197 | -6.02114 | 4.02E-08 | 4.59E-06 | 8.42437  |
| CRISPLD2 | -0.98428 | 10.49457 | -5.95402 | 5.39E-08 | 5.98E-06 | 8.145565 |
| GABRB1   | 0.641715 | 9.194093 | 5.885554 | 7.25E-08 | 7.49E-06 | 7.862459 |
| STMN2    | 1.020483 | 8.011944 | 5.862384 | 8.01E-08 | 8.08E-06 | 7.766956 |
| SLC25A37 | -0.73597 | 8.572932 | -5.8024  | 1.04E-07 | 1.00E-05 | 7.520443 |
| N6AMT1   | 0.708443 | 7.71084  | 5.785509 | 1.12E-07 | 1.05E-05 | 7.451223 |
| FOSL1    | -1.51492 | 7.104538 | -5.78214 | 1.13E-07 | 1.05E-05 | 7.437423 |
| NPL      | 0.618005 | 10.01731 | 5.78124  | 1.14E-07 | 1.05E-05 | 7.433742 |
| TIPARP   | -0.64257 | 9.505693 | -5.7591  | 1.25E-07 | 1.14E-05 | 7.343186 |
| LTC4S    | 0.910591 | 8.007092 | 5.703725 | 1.58E-07 | 1.37E-05 | 7.117293 |
| ADORA3   | 0.615326 | 9.8922   | 5.681801 | 1.74E-07 | 1.48E-05 | 7.028128 |
| PTBP2    | -0.59083 | 8.110909 | -5.66539 | 1.86E-07 | 1.56E-05 | 6.96147  |
| TDO2     | 0.678203 | 8.52936  | 5.602362 | 2.44E-07 | 1.92E-05 | 6.706335 |
| C1QB     | 0.740062 | 12.63989 | 5.587462 | 2.60E-07 | 2.03E-05 | 6.646204 |
| CECR1    | 0.764755 | 9.663545 | 5.578884 | 2.69E-07 | 2.09E-05 | 6.611621 |
| SYT17    | 0.751813 | 8.192801 | 5.573173 | 2.76E-07 | 2.12E-05 | 6.588611 |
| RPE65    | 0.768392 | 4.231391 | 5.561724 | 2.89E-07 | 2.19E-05 | 6.542511 |
| SLC2A3   | -1.03167 | 8.271477 | -5.52828 | 3.33E-07 | 2.48E-05 | 6.408094 |
| RUFY2    | -0.79519 | 8.028492 | -5.51761 | 3.49E-07 | 2.53E-05 | 6.365298 |
| SS18L1   | -0.5907  | 7.348355 | -5.50344 | 3.70E-07 | 2.61E-05 | 6.308526 |
| GZMA     | 0.696105 | 7.27884  | 5.499634 | 3.76E-07 | 2.62E-05 | 6.293272 |
| HOXD11   | -0.68946 | 7.705326 | -5.48174 | 4.05E-07 | 2.81E-05 | 6.221699 |
| AASS     | -0.69911 | 7.769448 | -5.45918 | 4.46E-07 | 2.95E-05 | 6.131597 |
| NPR3     | 0.633299 | 7.833305 | 5.452389 | 4.59E-07 | 2.99E-05 | 6.104501 |
| PCDH12   | 0.703773 | 8.785614 | 5.420812 | 5.23E-07 | 3.36E-05 | 5.978766 |
| MGAT4C   | 0.692565 | 7.062145 | 5.420722 | 5.24E-07 | 3.36E-05 | 5.978408 |
| AIF1     | 0.603783 | 10.70018 | 5.414986 | 5.36E-07 | 3.39E-05 | 5.955604 |
| DLEU2L   | -0.74268 | 4.821825 | -5.39127 | 5.92E-07 | 3.65E-05 | 5.861456 |
| FAM155A  | 0.767929 | 8.739895 | 5.388039 | 6.00E-07 | 3.68E-05 | 5.848638 |
| RTP4     | 0.807966 | 7.790635 | 5.377585 | 6.27E-07 | 3.80E-05 | 5.807212 |
| IGLL5    | 1.053142 | 9.62625  | 5.348537 | 7.07E-07 | 4.15E-05 | 5.692303 |
| RGS4     | 0.620612 | 8.763929 | 5.33055  | 7.62E-07 | 4.40E-05 | 5.621306 |
| KCNK2    | 1.105522 | 7.712636 | 5.323312 | 7.85E-07 | 4.50E-05 | 5.592766 |
| TREM2    | 0.962456 | 9.178594 | 5.31625  | 8.09E-07 | 4.61E-05 | 5.564944 |
| CRB1     | 0.68914  | 7.084811 | 5.308901 | 8.34E-07 | 4.71E-05 | 5.536006 |
| AMPH     | -0.71141 | 7.374612 | -5.29272 | 8.92E-07 | 4.90E-05 | 5.472351 |
| FCF1     | -0.89264 | 6.532173 | -5.28133 | 9.34E-07 | 5.04E-05 | 5.427617 |
| ANKRD36f | -0.68327 | 8.768291 | -5.27053 | 9.77E-07 | 5.22E-05 | 5.385245 |
| HYMAI    | -0.65755 | 8.406802 | -5.26973 | 9.80E-07 | 5.22E-05 | 5.382123 |
| C1QA     | 0.71746  | 11.707   | 5.252168 | 1.05E-06 | 5.49E-05 | 5.313299 |
| GPR56    | -0.6049  | 8.506683 | -5.2209  | 1.20E-06 | 6.14E-05 | 5.191075 |
| ANKRD11  | -0.74583 | 8.907295 | -5.19662 | 1.32E-06 | 6.67E-05 | 5.096416 |
| NKG7     | 0.935034 | 7.400854 | 5.194707 | 1.33E-06 | 6.67E-05 | 5.088966 |
| LOC44160 | 0.716775 | 5.917178 | 5.189516 | 1.36E-06 | 6.79E-05 | 5.068763 |

|          |          |          |          |          |          |          |
|----------|----------|----------|----------|----------|----------|----------|
| SGCA     | 0.870942 | 8.45106  | 5.169576 | 1.48E-06 | 7.16E-05 | 4.991249 |
| ZIC1     | 0.856536 | 10.47715 | 5.153775 | 1.58E-06 | 7.55E-05 | 4.929937 |
| LDLR     | -0.67228 | 8.115609 | -5.13826 | 1.68E-06 | 8.01E-05 | 4.86984  |
| POSTN    | -1.14528 | 10.92701 | -5.12297 | 1.79E-06 | 8.43E-05 | 4.810687 |
| EPHA3    | 0.605047 | 7.337711 | 5.120355 | 1.81E-06 | 8.48E-05 | 4.800576 |
| DDIT4    | -0.94033 | 11.22517 | -5.08303 | 2.10E-06 | 9.65E-05 | 4.656642 |
| KLHL24   | -0.66678 | 7.924677 | -5.07921 | 2.14E-06 | 9.69E-05 | 4.641927 |
| APOE     | 0.885045 | 11.45182 | 5.047194 | 2.43E-06 | 0.000108 | 4.51894  |
| TMEM51   | 0.789168 | 10.10207 | 5.043067 | 2.47E-06 | 0.000109 | 4.503114 |
| CYSLTR2  | 0.606889 | 7.490665 | 5.032873 | 2.58E-06 | 0.000112 | 4.464063 |
| CXCL2    | -1.04985 | 9.361804 | -5.0157  | 2.76E-06 | 0.000119 | 4.398351 |
| RRAD     | -0.87565 | 8.152007 | -4.98288 | 3.15E-06 | 0.000132 | 4.273147 |
| EGLN3    | -0.67688 | 7.906461 | -4.96903 | 3.33E-06 | 0.000138 | 4.220434 |
| MCOLN3   | 0.709936 | 8.167582 | 4.965201 | 3.39E-06 | 0.00014  | 4.205884 |
| CCNL1    | -0.61512 | 10.43872 | -4.90483 | 4.31E-06 | 0.00017  | 3.97717  |
| WIF1     | 1.625796 | 8.011187 | 4.902747 | 4.35E-06 | 0.000171 | 3.96931  |
| SLC9A5   | -0.61261 | 7.92536  | -4.89601 | 4.47E-06 | 0.000173 | 3.943901 |
| HLA-DQB1 | 0.596568 | 9.697417 | 4.892987 | 4.52E-06 | 0.000175 | 3.932493 |
| SGCG     | 0.772184 | 7.157347 | 4.876829 | 4.82E-06 | 0.000184 | 3.871624 |
| HLA-DQB1 | 0.847447 | 10.51857 | 4.869018 | 4.97E-06 | 0.000188 | 3.842238 |
| DPEP2    | 0.757298 | 8.086365 | 4.863927 | 5.07E-06 | 0.00019  | 3.823102 |
| DEFA4    | 0.658884 | 7.774015 | 4.849706 | 5.37E-06 | 0.0002   | 3.769702 |
| CRIP1    | 0.704833 | 12.04988 | 4.838563 | 5.61E-06 | 0.000206 | 3.727921 |
| CAMK2N1  | -0.74978 | 9.799394 | -4.83761 | 5.63E-06 | 0.000206 | 3.724352 |
| INSIG1   | -0.60821 | 9.076593 | -4.8262  | 5.89E-06 | 0.000214 | 3.681615 |
| HLA-DMB  | 0.8064   | 9.83506  | 4.824507 | 5.93E-06 | 0.000214 | 3.675298 |
| SEMA3A   | 0.618486 | 7.139653 | 4.808263 | 6.33E-06 | 0.000224 | 3.614591 |
| DPT      | 0.784379 | 12.73505 | 4.787732 | 6.86E-06 | 0.000238 | 3.538026 |
| DUOX2    | -1.08545 | 6.881782 | -4.78588 | 6.91E-06 | 0.000239 | 3.531131 |
| IL3RA    | -0.70981 | 8.583353 | -4.78539 | 6.92E-06 | 0.000239 | 3.529308 |
| CLEC4A   | 0.590681 | 8.103441 | 4.763617 | 7.54E-06 | 0.000255 | 3.448337 |
| STC1     | -0.58518 | 8.220105 | -4.76285 | 7.56E-06 | 0.000256 | 3.445476 |
| TDRD12   | -0.72323 | 5.892181 | -4.7349  | 8.44E-06 | 0.000279 | 3.341865 |
| LIF      | -1.09355 | 8.905184 | -4.7248  | 8.78E-06 | 0.000287 | 3.304518 |
| GSDMB    | -0.59262 | 7.246156 | -4.72133 | 8.90E-06 | 0.00029  | 3.291703 |
| CORO1A   | 0.633928 | 8.754339 | 4.719261 | 8.97E-06 | 0.000291 | 3.28405  |
| SLC7A5   | -0.84083 | 8.089016 | -4.71046 | 9.29E-06 | 0.000295 | 3.251551 |
| TAC1     | 1.072601 | 6.679003 | 4.705321 | 9.48E-06 | 0.000298 | 3.232603 |
| PDZRN4   | 0.66049  | 7.401004 | 4.70498  | 9.49E-06 | 0.000298 | 3.231345 |
| NFKB2    | -0.69468 | 9.784641 | -4.69286 | 9.95E-06 | 0.000308 | 3.186682 |
| KAL1     | 0.928779 | 8.039381 | 4.692615 | 9.96E-06 | 0.000308 | 3.185785 |
| CEBPA    | 0.655974 | 9.74507  | 4.682697 | 1.03E-05 | 0.000316 | 3.149293 |
| TPSAB1   | 0.74298  | 10.16753 | 4.651363 | 1.17E-05 | 0.000349 | 3.034302 |
| KLF9     | -0.60996 | 9.186719 | -4.64274 | 1.21E-05 | 0.000359 | 3.002748 |
| IL1B     | -0.58706 | 8.649215 | -4.62614 | 1.29E-05 | 0.000372 | 2.942079 |
| SLC18A2  | 0.751147 | 7.657897 | 4.623325 | 1.30E-05 | 0.000372 | 2.931794 |
| C10orf10 | -0.78926 | 10.22374 | -4.58945 | 1.49E-05 | 0.000413 | 2.808426 |
| ETS2     | -0.78612 | 8.098063 | -4.56275 | 1.65E-05 | 0.000448 | 2.711594 |
| NPTX2    | 0.646367 | 8.598685 | 4.56104  | 1.66E-05 | 0.00045  | 2.705401 |
| MT1M     | -0.84321 | 11.00592 | -4.48133 | 2.25E-05 | 0.000573 | 2.41839  |
| AHR      | 0.599949 | 9.448822 | 4.478351 | 2.27E-05 | 0.000579 | 2.40772  |
| ADM      | -0.74277 | 12.22934 | -4.45579 | 2.48E-05 | 0.00062  | 2.327086 |
| IGJ      | 1.348294 | 8.99908  | 4.437444 | 2.65E-05 | 0.000653 | 2.261692 |
| NID1     | -0.61317 | 8.448261 | -4.43151 | 2.71E-05 | 0.000662 | 2.240591 |
| ATP8B1   | -0.63143 | 8.325182 | -4.40719 | 2.98E-05 | 0.000716 | 2.154214 |
| DDX3Y    | -1.2738  | 8.163133 | -4.38695 | 3.21E-05 | 0.000768 | 2.082598 |
| USP53    | -0.74989 | 7.2936   | -4.38525 | 3.23E-05 | 0.000771 | 2.076596 |
| ANKH     | 0.74433  | 9.208053 | 4.360893 | 3.54E-05 | 0.000826 | 1.99067  |

|          |          |          |          |          |          |          |
|----------|----------|----------|----------|----------|----------|----------|
| CXCL8    | -1.18505 | 6.15583  | -4.34708 | 3.73E-05 | 0.000856 | 1.942086 |
| TNFRSF10 | -0.80575 | 7.919284 | -4.34522 | 3.76E-05 | 0.000859 | 1.935549 |
| CPA3     | 0.747666 | 8.424289 | 4.321152 | 4.11E-05 | 0.000914 | 1.851146 |
| HOXA3    | -0.58756 | 7.008757 | -4.29437 | 4.54E-05 | 0.000982 | 1.757567 |
| MXD1     | -0.63929 | 6.649563 | -4.2293  | 5.77E-05 | 0.0012   | 1.53179  |
| ACADL    | -0.7628  | 5.736016 | -4.21891 | 6.00E-05 | 0.001226 | 1.495945 |
| UBE2O    | -0.66666 | 7.428625 | -4.217   | 6.04E-05 | 0.001232 | 1.489379 |
| WFDC1    | 0.614596 | 8.27627  | 4.207778 | 6.25E-05 | 0.001266 | 1.457619 |
| NLGN4X   | 0.667552 | 7.929568 | 4.195624 | 6.54E-05 | 0.001307 | 1.415836 |
| IFIT1    | 0.595864 | 9.267183 | 4.192179 | 6.62E-05 | 0.001319 | 1.404008 |
| IER3     | -0.71581 | 10.1442  | -4.17084 | 7.16E-05 | 0.001381 | 1.33089  |
| MTUS2    | 0.798344 | 7.270022 | 4.131841 | 8.25E-05 | 0.001524 | 1.19786  |
| CXADR    | 0.714889 | 8.042645 | 4.129574 | 8.32E-05 | 0.001532 | 1.190154 |
| MYOM2    | 0.645336 | 6.844435 | 4.109742 | 8.94E-05 | 0.001622 | 1.122856 |
| IL6      | -0.93357 | 8.753476 | -4.10486 | 9.10E-05 | 0.001641 | 1.106328 |
| TMEM100  | 0.590371 | 10.20614 | 4.092261 | 9.52E-05 | 0.001695 | 1.063711 |
| HPCA     | -0.77245 | 5.597555 | -4.0865  | 9.72E-05 | 0.001715 | 1.044244 |
| CYR61    | -0.70303 | 10.6432  | -4.07606 | 0.000101 | 0.001761 | 1.009039 |
| APOD     | -1.23874 | 9.604362 | -4.06547 | 0.000105 | 0.001817 | 0.973414 |
| MEST     | 0.70087  | 8.940668 | 4.058987 | 0.000107 | 0.001841 | 0.951607 |
| EDNRB    | -0.72499 | 10.77612 | -4.04614 | 0.000112 | 0.001901 | 0.908471 |
| SOCS5    | -0.66039 | 7.653644 | -4.03193 | 0.000118 | 0.001974 | 0.860888 |
| SBNO2    | -0.80816 | 9.167526 | -4.02575 | 0.000121 | 0.002007 | 0.840235 |
| PACS1    | -0.60095 | 6.726848 | -3.99581 | 0.000135 | 0.002166 | 0.740442 |
| USP9Y    | -0.96886 | 6.379092 | -3.98214 | 0.000141 | 0.002247 | 0.695067 |
| IFI44L   | 0.704842 | 8.378513 | 3.981293 | 0.000142 | 0.002248 | 0.692249 |
| AVPR1A   | -0.70114 | 6.078592 | -3.95538 | 0.000155 | 0.002423 | 0.606505 |
| CPE      | 0.71646  | 9.056313 | 3.947658 | 0.00016  | 0.002478 | 0.581032 |
| HSD11B2  | 0.697342 | 7.133475 | 3.920404 | 0.000176 | 0.002701 | 0.491392 |
| GADD45B  | -0.80364 | 10.5045  | -3.91997 | 0.000176 | 0.002701 | 0.489965 |
| SLC35F5  | -0.62831 | 8.394403 | -3.90404 | 0.000186 | 0.002798 | 0.437775 |
| MMP9     | 0.978565 | 11.16243 | 3.849527 | 0.000225 | 0.003219 | 0.260289 |
| GOLIM4   | -0.60919 | 6.181265 | -3.83785 | 0.000235 | 0.003306 | 0.222505 |
| IGLV1-44 | 0.821149 | 8.892012 | 3.822735 | 0.000247 | 0.003434 | 0.173701 |
| SPON1    | 0.620203 | 9.078342 | 3.801563 | 0.000266 | 0.003608 | 0.105577 |
| SLC16A7  | -0.6187  | 7.182682 | -3.78265 | 0.000284 | 0.003777 | 0.044936 |
| TPPP3    | 0.659752 | 10.63552 | 3.782546 | 0.000284 | 0.003777 | 0.044617 |
| ERAP2    | 0.655395 | 8.839206 | 3.775577 | 0.000291 | 0.00384  | 0.02233  |
| IL11     | -0.9305  | 7.110138 | -3.76985 | 0.000297 | 0.00387  | 0.004036 |
| CCL18    | 0.739527 | 8.797799 | 3.745153 | 0.000323 | 0.004092 | -0.07462 |
| SLC22A3  | 0.611929 | 6.605128 | 3.731575 | 0.000339 | 0.004223 | -0.1177  |
| NOV      | 0.593679 | 9.170315 | 3.714448 | 0.000359 | 0.00441  | -0.17189 |
| SIK1     | -0.84617 | 10.01986 | -3.70742 | 0.000368 | 0.004485 | -0.19408 |
| KIAA0754 | -0.74142 | 6.2396   | -3.66973 | 0.000418 | 0.004916 | -0.31253 |
| OLR1     | 0.723208 | 8.603343 | 3.667039 | 0.000422 | 0.004946 | -0.32095 |
| DPP4     | -0.63476 | 8.161825 | -3.65565 | 0.000438 | 0.005091 | -0.35654 |
| DNASE1L3 | 0.939461 | 8.323587 | 3.653276 | 0.000442 | 0.005123 | -0.36396 |
| APOLD1   | -0.69356 | 9.579448 | -3.63186 | 0.000475 | 0.005398 | -0.43066 |
| RHOH     | 0.619576 | 8.900388 | 3.619881 | 0.000494 | 0.005542 | -0.46783 |
| RND1     | -0.68904 | 6.402187 | -3.61024 | 0.000511 | 0.005703 | -0.49769 |
| S100A9   | 0.83843  | 9.229813 | 3.571132 | 0.000582 | 0.00633  | -0.61822 |
| BTC      | 0.588628 | 8.320194 | 3.54435  | 0.000636 | 0.006744 | -0.70019 |
| PENK     | 0.675284 | 9.03869  | 3.50051  | 0.000735 | 0.007494 | -0.83339 |
| FKBP5    | -1.09897 | 6.31748  | -3.46916 | 0.000814 | 0.008061 | -0.92787 |
| ANGPTL4  | -0.78907 | 11.7056  | -3.46636 | 0.000822 | 0.008108 | -0.93628 |
| GPR1     | 0.688316 | 6.645624 | 3.460654 | 0.000837 | 0.008242 | -0.95341 |
| HILPDA   | -0.64153 | 11.5127  | -3.44634 | 0.000877 | 0.008464 | -0.99625 |
| WNT5B    | 0.68475  | 8.744824 | 3.431006 | 0.000922 | 0.008778 | -1.04202 |



|          |          |          |          |          |          |          |
|----------|----------|----------|----------|----------|----------|----------|
| SCRG1    | 0.888229 | 11.47628 | 3.361517 | 0.001153 | 0.010374 | -1.24743 |
| TXLNGY   | -0.68099 | 6.345164 | -3.34078 | 0.001232 | 0.010876 | -1.3081  |
| RNF19A   | -0.64831 | 9.2766   | -3.33562 | 0.001253 | 0.010985 | -1.32318 |
| ARC      | -0.71535 | 7.205329 | -3.3148  | 0.001338 | 0.011561 | -1.38372 |
| NUDT4    | -0.6097  | 6.160784 | -3.31208 | 0.00135  | 0.011612 | -1.3916  |
| MGC1248  | -0.62008 | 8.309435 | -3.30908 | 0.001363 | 0.011682 | -1.40032 |
| NPY1R    | 0.648716 | 6.357109 | 3.284431 | 0.001473 | 0.012317 | -1.47153 |
| NLGN4Y   | -0.60729 | 7.218904 | -3.24591 | 0.001663 | 0.013485 | -1.58201 |
| ATF3     | -0.60405 | 9.844087 | -3.24414 | 0.001672 | 0.013524 | -1.58705 |
| KDM5D    | -0.98865 | 8.758711 | -3.22487 | 0.001776 | 0.01406  | -1.64193 |
| HLA-DRB4 | -1.11335 | 8.74834  | -3.18371 | 0.002018 | 0.015449 | -1.75825 |
| TIMP4    | -0.81572 | 8.337347 | -3.17213 | 0.002091 | 0.015871 | -1.79077 |
| CCL20    | -0.86853 | 6.368679 | -3.16625 | 0.002129 | 0.016042 | -1.80724 |
| HBB      | 0.792862 | 10.92441 | 3.146156 | 0.002265 | 0.016702 | -1.86337 |
| LMNB1    | -0.63903 | 6.948077 | -3.09018 | 0.002686 | 0.019027 | -2.01821 |
| TLR8     | 0.612233 | 6.501908 | 3.052968 | 0.003006 | 0.020619 | -2.11991 |
| SERPINE1 | -0.6871  | 9.188189 | -3.0381  | 0.003143 | 0.021378 | -2.16027 |
| CRLF1    | 0.768935 | 11.49645 | 2.988555 | 0.003643 | 0.023735 | -2.29362 |
| FOXC2    | -0.63384 | 6.491453 | -2.9668  | 0.003885 | 0.024895 | -2.35162 |
| SLCO4A1  | -0.5903  | 7.472972 | -2.80125 | 0.006272 | 0.035174 | -2.78153 |
| RPS4Y1   | -0.90691 | 10.84912 | -2.76295 | 0.006989 | 0.037938 | -2.87808 |
| XIST     | 1.003308 | 9.213733 | 2.738974 | 0.007475 | 0.039658 | -2.93797 |
| EIF1AY   | -0.65921 | 6.568882 | -2.66168 | 0.009259 | 0.046384 | -3.12801 |

### Supplementary Table S4 Results of SVM and RF

| SVM       |          |     | RF       |            |
|-----------|----------|-----|----------|------------|
| FeatureNa | AvgRank  |     | Gene     | importance |
| 1         | TLR7     | 1.3 | TLR7     | 10.68836   |
| 2         | SLC25A37 | 1.9 | IL1B     | 8.02711    |
| 3         | IL1B     | 3.5 | CRISPLD2 | 6.878275   |
| 4         | CRISPLD2 | 3.7 | SLC25A37 | 6.043948   |
| 5         | MMP9     | 5.4 | MMP9     | 4.702886   |
| 6         | TLR8     | 5.8 | IL6      | 3.54137    |
| 7         | IL6      | 6.4 | TLR8     | 1.589664   |

**Supplementary Table S5 DE-NRGs targeted drugs**

| gene     | drug                       | interaction_types         |
|----------|----------------------------|---------------------------|
| TLR7     | HYDROXYCHLOROQUINE         | antagonist                |
| TLR7     | CHLOROQUINE                |                           |
| TLR7     | HYDROXYCHLOROQUINE SULFATE | antagonist                |
| TLR7     | IMIQUIMOD                  | agonist                   |
| CRISPLD2 | DEXAMETHASONE              |                           |
| IL1B     | ACITRETIN                  |                           |
| IL1B     | CEFACLOR                   |                           |
| IL1B     | ERYTHROMYCIN               |                           |
| IL1B     | THYROGLOBULIN              |                           |
| IL1B     | LANSOPRAZOLE               |                           |
| IL1B     | PENTAMIDINE                |                           |
| IL1B     | OFLOXACIN                  |                           |
| IL1B     | ALTEPLASE                  |                           |
| IL1B     | TILUDRONIC ACID            |                           |
| IL1B     | OMEPRAZOLE                 |                           |
| IL1B     | PENTOXIFYLLINE             |                           |
| IL1B     | USTEKINUMAB                |                           |
| IL1B     | GLUCOSAMINE                |                           |
| IL1B     | PRAVASTATIN                |                           |
| IL1B     | HYDROQUINONE               |                           |
| IL1B     | RISEDRONIC ACID            |                           |
| IL1B     | MORPHINE                   |                           |
| IL1B     | MELATONIN                  |                           |
| IL1B     | RABEPRAZOLE                |                           |
| IL1B     | RILONACEPT                 | binder inhibitor          |
| IL1B     | CANAKINUMAB                | binder antibody inhibitor |
| IL1B     | RALOXIFENE                 |                           |
| IL1B     | VERAPAMIL                  |                           |
| IL1B     | DIACEREIN                  |                           |
| IL1B     | ASPIRIN                    |                           |
| IL1B     | NICARDIPINE                |                           |
| IL1B     | HYDROCORTISONE             |                           |
| IL1B     | INFLIXIMAB                 |                           |
| MMP9     | BEVACIZUMAB                |                           |
